# Supplementary material for: Upregulation of nucleoprotein AHNAK is associated with poor outcome of pancreatic ductal adenocarcinoma prognosis via mediating epithelial-mesenchymal transition
Source: PubMed Central journal article supplement — J Cancer. 2019 Jun 10;10(16):3860–70. doi: 10.7150/jca.31291 (PMC6636292; doi:10.7150/jca.31291), 2019-06-10
Supplement: jcav10p3860s1.pdf [file jcav10p3860s1.pdf]

Supplementary table 1. Primer sequences in study

| Gene Symbol | Direction | Sequence (5' – 3')     |
|-------------|-----------|------------------------|
| GAPDH       | F         | TGACAACAGCCTCAAGAT     |
|             | R         | GAGTCCTTCCACGATACC     |
| AHNAK       | F         | GTGGGTGCCACCATCTACTT   |
|             | R         | GGTGGAGACTGAAACTGCCC   |
| CDH1        | F         | CAGGCCTCCGTTTCTGGAAT   |
|             | R         | GGTGTATACAGCCTCCCACG   |
| CDH2        | F         | TGCGGTACAGTGTAAGTGGG   |
|             | R         | TGCGGTACAGTGTAAGTGGG   |
| SNAI1       | F         | GAGGACAGTGGGAAAGGCTC   |
|             | R         | TGGCTTCGGATGTGCATCTT   |
| CTNNB-1     | F         | AGCTTCCAGACACGCTATCAT  |
|             | R         | CGGTACAACGAGCTGTTTCTAC |
| EGFR        | F         | TTGCCGCAAAGTGTGTAACG   |
|             | R         | AGGGAACAGGAAATATGTCGAA |
| COL1A1      | F         | GGGCCAGTCGTCGGAG       |
|             | R         | TGGGATGTCTTCGTCTTGGC   |
| APAC1       | F         | TACAAAGCACAGTGGGGAAGT  |
|             | R         | GGGTGGGCTGCAAGATACTC   |
| BBC3        | F         | CTCGGTGCTCCTTCACTCTG   |
|             | R         | CTCACAAGCAGGGCTCACAG   |
| BTG2        | F         | CCCTGAGCTGGACTGTTGAG   |
|             | R         | TTGTCTGAGTGCAAGTGAGGA  |
| PRKCA       | F         | CACGAGGTGAAGGACCACAA   |
|             | R         | CCGTGAGTTTCACTCGGTCA   |
| TNF         | F         | CACAGTGAAGTGCTGGCAAC   |
|             | R         | ACATTGGGTCCCCCAGGATA   |
| TNFRSF10B   | F         | GTCCACAAAGAATCAGGCATCA |
|             | R         | CCAGGTCGTTGTGAGCTTCT   |

TP53

F

GAGACCTGTGGGAAGCGAAA

R

CTGGCATTCTGGGAGCTTCA

---
